# Supplementary material
Source: HighWire-hosted journal article supplement (https://www.annfammed.org/highwire/filestream/7611/field_highwire_adjunct_files/0/Wadland_new_app5.pdf)
Supplement: Wadland_new_app5.pdf [file Wadland_new_app5.pdf]

Online Supplementary Material

Wadland WC, Holtrop J, Weismantel D, Pathak PK, Fadel H, Powell J. Practice-based referral rates to a tobacco cessation quit line: assessing the impact of comparative feedback vs general reminders. *Ann Fam Med*. 2007;5(2):135-142.

<http://www.annfammed.org/cgi/content/full/5/2/135/DC1>

**Supplemental Appendix. An Intraclass Correlation Model for a Physician-Based Sampling Scheme**

Pramod K. Pathak<sup>1,2,3</sup>  
David Weismantel<sup>4</sup>  
William Wadland,<sup>4</sup> et al

<sup>1</sup>Department of Statistics and Probability, Michigan State University, East Lansing, Mich

<sup>2</sup>Department of Epidemiology, Michigan State University, East Lansing, Mich

<sup>3</sup>Department of Family and Community Medicine, Michigan State University, East Lansing, Mich

<sup>4</sup>Department of Family Practice, Michigan State University, East Lansing, Mich

**ABSTRACT**

We derive a closed-form formula for intraclass correlation for a sampling scheme based on physician-based research networks. The formula is applied to an illustrative example from our ongoing research on physician-assisted smoking-cessation programs. It provides a means of calculating the design effect of cluster-based sampling schemes compared with simple random sampling.

**1. Statement of the Problem**

Consider a population of N clusters (sites) of unequal sizes. Suppose that the jth cluster contains  $M_j$  units (clinicians),  $1 \leq j \leq N$ . Suppose that a cluster is first drawn at random from the given population of N clusters. Then a pair of 2 units is drawn one-by-one therefrom by simple random sampling without replacement. Now let  $y_1$  and  $y_2$  denote the Y-variate values associated with the 2 units drawn, the respective number of subjects referred to by the 2 clinicians for smoking cessation program. Let  $\rho$  denote the coefficient of correlation between  $y_1$  and  $y_2$ . We refer to  $\rho$  as the intraclass (cluster) correlation for the Y-variate values. It measures the intracluster association of Y-variate values.

It can be shown that

$$\begin{aligned} \text{Var}(y_1) &= \text{Var}(y_2) \\ &= \frac{1}{N} \sum \sigma_j^2 + \frac{1}{N} \sum (Y_j - Y_{..})^2 \end{aligned} \tag{1.1}$$

where for each  $j$ ,  $1 \leq j \leq N$ ,  $Y_j$  and  $\sigma_j^2$  respectively denote the mean and the variance of the Y-variate values in the jth cluster,  $Y_{..} = N^{-1} \sum Y_j$  being the unweighted average of the cluster means  $Y_j$ .

And

$$\text{Cov}(y_1, y_2) = -\frac{1}{N} \sum \frac{1}{(M_j - 1)} \sigma_j^2 + \frac{1}{N} \sum (Y_j - Y_{..})^2 \quad (1.2)$$

Therefore, the intraclass correlation admits the following form:

$$\rho(y_1, y_2) = \frac{-\sum (M_j - 1)^{-1} \sigma_j^2 + \sum (Y_j - Y_{..})^2}{\sum \sigma_j^2 + \sum (Y_j - Y_{..})^2} \quad (1.3)$$

## 2. Illustrative Example

The data for the smoking cessation consists of  $N = 87$  sites and the variable of interest is the total number of referrals by each clinician ( $Y$ ). Initial analysis of the data resulted in the following statistics:

**Mean cluster size:**  $M = 3.59$

**Between cluster variation:**  $\sum (Y_j - Y_{..})^2 = 14580.13$

**Total within cluster variation:**  $\sum \sigma_j^2 = 1175.82$

**Total per unit within cluster variation:**  $\sum [(\sigma_j^2)/((M_j - 1))] = 367.03$

The intraclass correlation is:

$$\begin{aligned} \rho &= \frac{(-367.03 + 14580.13)}{(1175.82 + 14580.13)} \\ &= .902 \end{aligned} \quad (2.1)$$

And the design effect of the survey for the smoking cessation study is:

**Design effect:**  $1 + (M - 1) \rho = 3.34$

## Reference

1. Pathak PK. An introduction to sampling theory and practice. Available at: <http://www.stt.msu.edu/~pathakp/book0-5>. Accessed 13 March 2007.
